# Supplementary material
Source: PubMed Central journal article supplement (PMC11626286)
Supplement: ajcr0014-5154-f16.pdf [file ajcr0014-5154-f16.pdf]

# Machine learning-based prognostic models of lung cancer brain metastases

**Supplementary Table 1.** Main parameters of the XGBoost model

| Parameter        | Value |
|------------------|-------|
| Gamma            | 1     |
| Scale_pos_weight | 1     |
| Min_child_weight | 5     |
| Subsample        | 0.7   |
| Alpha            | 1     |
| Nround           | 20    |
| Max_depth        | 5     |
| Eta              | 0.1   |

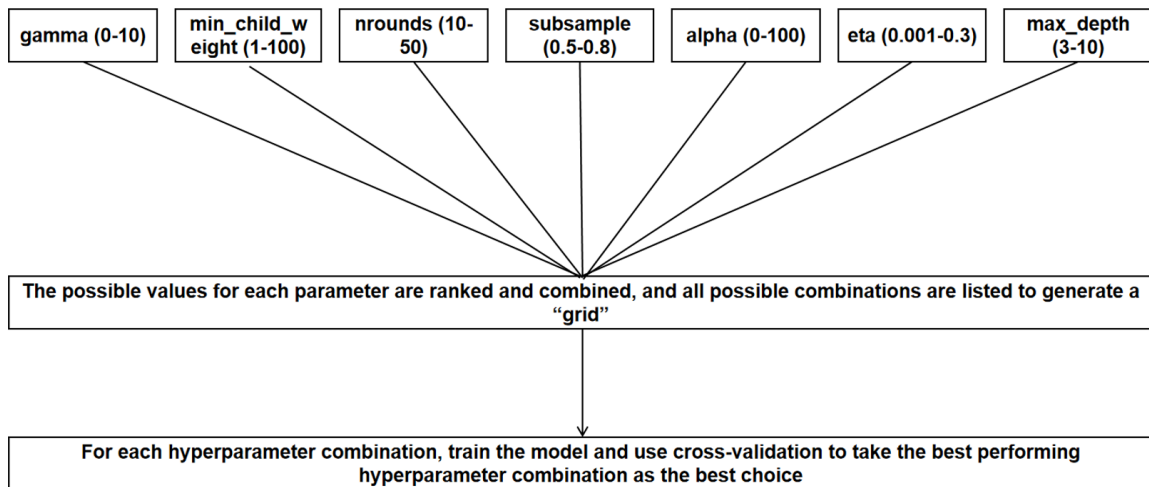

**Supplementary Figure 1.** The flowchart detailed the procedure for main hyperparameters selection of XGBoost models. We used “GridSearch” GridSearch s.GBoost models.XGBoost models.dhyperparameters (including gamma, alpha, max depth, nrounds, eta, min\_child\_weight, etc.). The possible values for each parameter are ranked and combined, and all possible combinations are listed to generate a “grid”. For each hyperparameter combination, train the model and use cross-validation to take the best performing hyperparameter combination as the best choice.

## Machine learning-based prognostic models of lung cancer brain metastases

**Supplementary Table 2.** Univariate and multivariate Cox analysis of LCBM characteristics extracted from training data

|                                         | OS                      |           |         |                           |           |         |
|-----------------------------------------|-------------------------|-----------|---------|---------------------------|-----------|---------|
|                                         | Univariate Cox analysis |           |         | Multivariate Cox analysis |           |         |
|                                         | HR                      | 95% CI    | P Value | HR                        | 95% CI    | P Value |
| <b>Age</b>                              |                         |           |         |                           |           |         |
| < 50                                    | Reference               |           |         | Reference                 |           |         |
| 50-59                                   | 1.33                    | 1.20-1.47 | ***     | 1.21                      | 1.08-1.35 | ***     |
| 60-69                                   | 1.50                    | 1.36-1.66 | ***     | 1.33                      | 1.19-1.47 | ***     |
| 70-79                                   | 1.88                    | 1.69-2.08 | ***     | 1.61                      | 1.44-1.80 | ***     |
| ≥ 80                                    | 2.41                    | 2.14-2.73 | ***     | 1.68                      | 1.47-1.93 | ***     |
| <b>Sex</b>                              |                         |           |         |                           |           |         |
| Female                                  | Reference               |           |         | Reference                 |           |         |
| Male                                    | 1.29                    | 1.23-1.34 | ***     | 1.23                      | 1.17-1.30 | ***     |
| <b>Race</b>                             |                         |           |         |                           |           |         |
| White                                   | Reference               |           |         | Reference                 |           |         |
| Black                                   | 1.07                    | 0.99-1.14 | 0.07    | 1.00                      | 0.93-1.09 | 0.89    |
| Others                                  | 0.68                    | 0.63-0.74 | ***     | 0.71                      | 0.65-0.77 | ***     |
| <b>Marriage status</b>                  |                         |           |         |                           |           |         |
| Married                                 | Reference               |           |         | Reference                 |           |         |
| Divorced/Separated                      | 1.28                    | 1.20-1.37 | ***     | 1.24                      | 1.15-1.33 | ***     |
| Single                                  | 1.16                    | 1.09-1.23 | ***     | 1.07                      | 1.00-1.14 | 0.07    |
| Widowed                                 | 1.33                    | 1.24-1.43 | ***     | 1.12                      | 1.03-1.22 | **      |
| <b>Months from diagnosis to therapy</b> |                         |           |         |                           |           |         |
| 0 month                                 | Reference               |           |         | Reference                 |           |         |
| ≥ 1 month                               | 0.82                    | 0.78-0.86 | ***     | 0.78                      | 0.74-0.82 | ***     |
| <b>Pathological type</b>                |                         |           |         |                           |           |         |
| Adenocarcinoma                          | Reference               |           |         | Reference                 |           |         |
| Squamous cell                           | 1.71                    | 1.60-1.83 | ***     | 1.48                      | 1.37-1.59 | ***     |
| Small cell                              | 1.37                    | 1.27-1.48 | ***     | 1.31                      | 1.18-1.46 | ***     |
| Large cell                              | 1.29                    | 1.11-1.51 | **      | 1.38                      | 1.17-1.64 | ***     |
| Others                                  | 1.50                    | 1.41-1.59 | ***     | 1.30                      | 1.21-1.40 | ***     |
| <b>Grade</b>                            |                         |           |         |                           |           |         |
| Grade I                                 | Reference               |           |         | Reference                 |           |         |
| Grade II                                | 1.06                    | 0.92-1.21 | 0.42    | 1.14                      | 0.98-1.31 | 0.08    |
| Grade III                               | 1.42                    | 1.24-1.61 | ***     | 1.36                      | 1.18-1.56 | ***     |
| Grade IV                                | 1.52                    | 1.31-1.76 | ***     | 1.39                      | 1.17-1.65 | ***     |
| <b>T Stage</b>                          |                         |           |         |                           |           |         |
| T1                                      | Reference               |           |         | Reference                 |           |         |
| T2                                      | 1.31                    | 1.20-1.42 | ***     | 1.34                      | 1.23-1.47 | ***     |
| T3                                      | 1.53                    | 1.41-1.67 | ***     | 1.50                      | 1.37-1.65 | ***     |
| T4                                      | 1.57                    | 1.45-1.71 | ***     | 1.50                      | 1.37-1.65 | ***     |
| <b>N Stage</b>                          |                         |           |         |                           |           |         |
| N0                                      | Reference               |           |         | Reference                 |           |         |
| N1                                      | 1.06                    | 0.97-1.16 | 0.18    | 1.05                      | 0.95-1.15 | 0.36    |
| N2                                      | 1.19                    | 1.12-1.26 | ***     | 1.15                      | 1.08-1.23 | ***     |
| N3                                      | 1.23                    | 1.14-1.31 | ***     | 1.18                      | 1.09-1.28 | ***     |
| <b>Chemotherapy</b>                     |                         |           |         |                           |           |         |
| No/unknown                              | Reference               |           |         | Reference                 |           |         |
| Yes                                     | 0.36                    | 0.34-0.38 | ***     | 0.39                      | 0.37-0.41 | ***     |

## Machine learning-based prognostic models of lung cancer brain metastases

|                  |           |           |     |           |           |     |
|------------------|-----------|-----------|-----|-----------|-----------|-----|
| Radiotherapy     |           |           |     |           |           |     |
| No/unknown       | Reference |           |     | Reference |           |     |
| Yes              | 0.59      | 0.56-0.62 | *** | 0.92      | 0.86-0.99 | *   |
| Surgery          |           |           |     |           |           |     |
| No               | Reference |           |     | Reference |           |     |
| Yes              | 0.48      | 0.43-0.53 | *** | 0.54      | 0.48-0.60 | *** |
| Bone metastasis  |           |           |     |           |           |     |
| No               | Reference |           |     | Reference |           |     |
| Yes              | 1.14      | 1.09-1.20 | *** | 1.20      | 1.13-1.27 | *** |
| Liver metastasis |           |           |     |           |           |     |
| No               | Reference |           |     | Reference |           |     |
| Yes              | 1.46      | 1.37-1.55 | *** | 1.34      | 1.25-1.44 | *** |
| Lung metastasis  |           |           |     |           |           |     |
| No               | Reference |           |     | Reference |           |     |
| Yes              | 1.24      | 1.17-1.3  | *** | 1.13      | 1.06-1.20 | *** |

\* $P < 0.05$ , \*\* $P < 0.01$ , \*\*\* $P < 0.001$ .

## Machine learning-based prognostic models of lung cancer brain metastases

**Supplementary Table 3.** Relevant characteristics of LCBM patients included from our hospital for XGBoost models external validation

| Age | Sex | Marital | Race | Months | Pathological | Grade | T  | N  | Surgery | Radiation | Chemotherapy | Bone | Liver | Lung | 6-month status | 1-year status | 2-year status |
|-----|-----|---------|------|--------|--------------|-------|----|----|---------|-----------|--------------|------|-------|------|----------------|---------------|---------------|
| 53  | 1   | 1       | 3    | 1      | 1            | NA    | NA | 3  | 0       | 0         | 1            | 0    | 0     | 0    | 1              | 0             | 0             |
| 62  | 1   | 1       | 3    | 1      | NA           | NA    | NA | 3  | 0       | 0         | 1            | 1    | 1     | 1    | 0              | 0             | 0             |
| 56  | 2   | 1       | 3    | 1      | 3            | NA    | NA | 3  | 1       | 0         | 1            | 0    | 0     | 0    | 1              | 1             | 0             |
| 69  | 2   | 1       | 3    | 1      | 1            | NA    | 1  | 3  | 0       | 0         | 1            | 1    | 0     | 0    | 1              | 0             | 0             |
| 60  | 2   | 1       | 3    | 1      | 1            | 2     | NA | NA | 1       | 1         | 1            | 0    | 0     | 0    | 1              | 1             | 1             |
| 44  | 2   | 1       | 3    | 1      | 3            | NA    | NA | NA | 0       | 1         | 0            | 0    | 0     | 0    | 0              | 0             | 0             |
| 63  | 2   | 1       | 3    | 1      | 2            | NA    | 1  | 3  | 0       | 1         | 1            | 0    | 0     | 0    | 1              | 0             | 0             |
| 58  | 2   | 1       | 3    | 1      | 1            | NA    | NA | NA | 0       | 1         | 1            | 0    | 0     | 0    | 1              | 0             | 0             |
| 61  | 2   | 1       | 3    | 1      | NA           | NA    | NA | 3  | 0       | 0         | 0            | 1    | 0     | 1    | 0              | 0             | 0             |
| 56  | 2   | 1       | 3    | 1      | 1            | NA    | NA | 1  | 1       | 0         | 1            | 0    | 0     | 0    | 1              | 1             | 0             |
| 61  | 2   | 1       | 3    | 1      | 3            | NA    | NA | 3  | 0       | 0         | 1            | 0    | 1     | 0    | 1              | 0             | 0             |
| 47  | 2   | 1       | 3    | 1      | NA           | NA    | NA | NA | 0       | 0         | 1            | 0    | 1     | 1    | 0              | 0             | 0             |
| 44  | 2   | 1       | 3    | 1      | 2            | NA    | 4  | 3  | 0       | 0         | 0            | 0    | 0     | 1    | 0              | 0             | 0             |
| 45  | 1   | 1       | 3    | 1      | 3            | NA    | NA | 3  | 0       | 1         | 1            | 0    | 0     | 0    | 1              | 0             | 0             |
| 72  | 2   | 1       | 3    | 1      | NA           | NA    | 3  | NA | 1       | 1         | 1            | 0    | 0     | 0    | 1              | 0             | 0             |
| 59  | 1   | 1       | 3    | 1      | 1            | NA    | 4  | NA | 0       | 0         | 1            | 0    | 0     | 0    | 0              | 0             | 0             |
| 66  | 2   | 1       | 3    | 1      | 1            | NA    | NA | 3  | 0       | 0         | 0            | 0    | 0     | 0    | 0              | 0             | 0             |
| 42  | 1   | 1       | 3    | 1      | 1            | NA    | 1  | 3  | 0       | 0         | 1            | 0    | 0     | 0    | 0              | 0             | 0             |
| 75  | 1   | 4       | 3    | 1      | 1            | 3     | NA | NA | 0       | 1         | 0            | 0    | 0     | 0    | 0              | 0             | 0             |
| 62  | 2   | 1       | 3    | 1      | 2            | NA    | 2  | NA | 0       | 1         | 1            | 1    | 0     | 1    | 0              | 0             | 0             |
| 54  | 2   | 1       | 3    | 1      | 5            | 1     | NA | 3  | 0       | 0         | 1            | 0    | 0     | 1    | 1              | 0             | 0             |
| 60  | 2   | 1       | 3    | 1      | 1            | NA    | 4  | 0  | 0       | 0         | 1            | 1    | 1     | 1    | 0              | 0             | 0             |
| 55  | 1   | 1       | 3    | 1      | 1            | NA    | NA | 1  | 1       | 1         | 1            | 1    | 0     | 0    | 1              | 1             | 1             |
| 69  | 2   | 1       | 3    | 1      | 5            | NA    | NA | NA | 1       | 0         | 1            | 1    | 0     | 0    | 1              | 0             | 0             |
| 61  | 2   | 1       | 3    | 1      | 1            | NA    | NA | 0  | 1       | 1         | 1            | 1    | 0     | 0    | 1              | 1             | 1             |
| 54  | 2   | 1       | 3    | 1      | 5            | 3     | NA | 0  | 1       | 0         | 0            | 0    | 0     | 0    | 0              | 0             | 0             |
| 72  | 2   | 1       | 3    | 1      | 2            | 3     | NA | NA | 0       | 0         | 0            | 0    | 0     | 0    | 0              | 0             | 0             |
| 56  | 2   | 1       | 3    | 2      | 2            | NA    | NA | NA | 0       | 0         | 1            | 0    | 0     | 0    | 1              | 1             | 0             |
| 73  | 2   | 1       | 3    | 1      | NA           | NA    | NA | NA | 1       | 1         | 1            | 1    | 0     | 0    | 1              | 0             | 0             |
| 64  | 2   | 1       | 3    | 1      | 3            | NA    | NA | NA | 1       | 0         | 1            | 0    | 0     | 0    | 1              | 0             | 0             |
| 52  | 2   | 1       | 3    | 1      | 3            | NA    | NA | NA | 0       | 0         | 1            | 0    | 0     | 0    | 1              | 1             | 0             |
| 49  | 2   | 1       | 3    | 1      | 3            | NA    | NA | NA | 0       | 0         | 1            | 0    | 0     | 0    | 1              | 1             | 0             |
